# Supplementary material for: Profiling analysis of long non-coding RNAs in early postnatal mouse hearts
Source: PubMed Central journal article supplement (PMC5339910; doi:10.1038/srep43485), 2017-03-07
Supplement: srep43485-s1.pdf [file srep43485-s1.pdf]

---

**Profiling analysis of long non-coding RNAs in early postnatal mouse hearts**

Xionshan Sun,<sup>1,2,\*</sup> Qi Han,<sup>1,2,\*</sup> Hongqin Luo,<sup>1,2</sup> Xiaodong Pan,<sup>1,2</sup> Yan Ji,<sup>1,2</sup> Yao Yang,<sup>1,2</sup>  
Hanying Chen,<sup>3</sup> Fangjie Wang,<sup>1,2</sup> Wenjing Lai,<sup>1,2</sup> Xiao Guan,<sup>1,2</sup> Qi Zhang,<sup>1,2</sup> Yuan Tang,<sup>1,2</sup>  
Jianhong Chu,<sup>4,5</sup> Jianhua Yu,<sup>4</sup> Weinian Shou,<sup>1,2,3</sup> Youcai Deng,<sup>1,2</sup> Xiaohui Li<sup>1,2</sup>

**Supplementary Figures and Figure Legends**

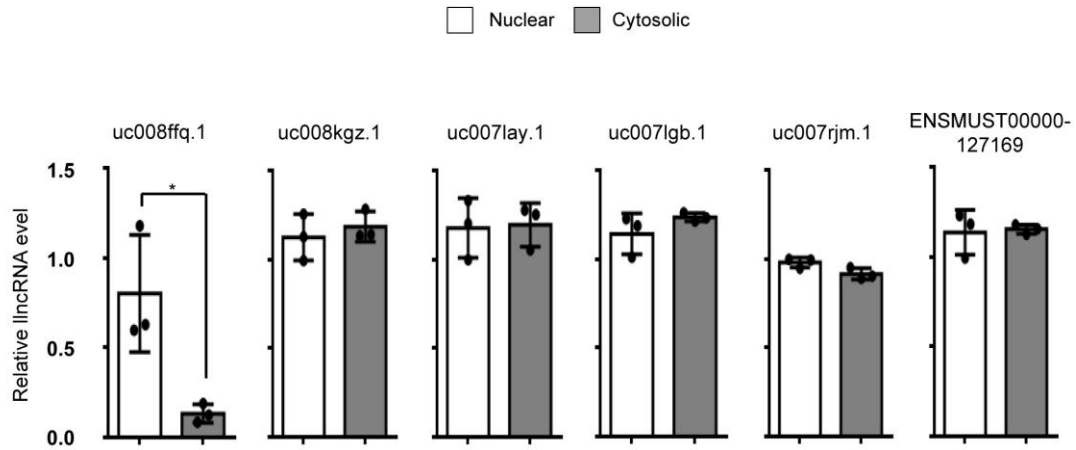

**Supplementary Figure S1. The cytosolic and nuclear distribution of lincRNAs determined by qRT-PCR analysis.** The RNA levels of lincRNAs in both cytoplasm and nucleus were determined *via* real time qRT-PCR. Data are presented as mean  $\pm$  S.D. \* indicates  $p < 0.05$ , which denote statistical comparison between the two marked groups. Paired two-tailed Student's *t*-test was used ( $n = 3$  cultures per group).

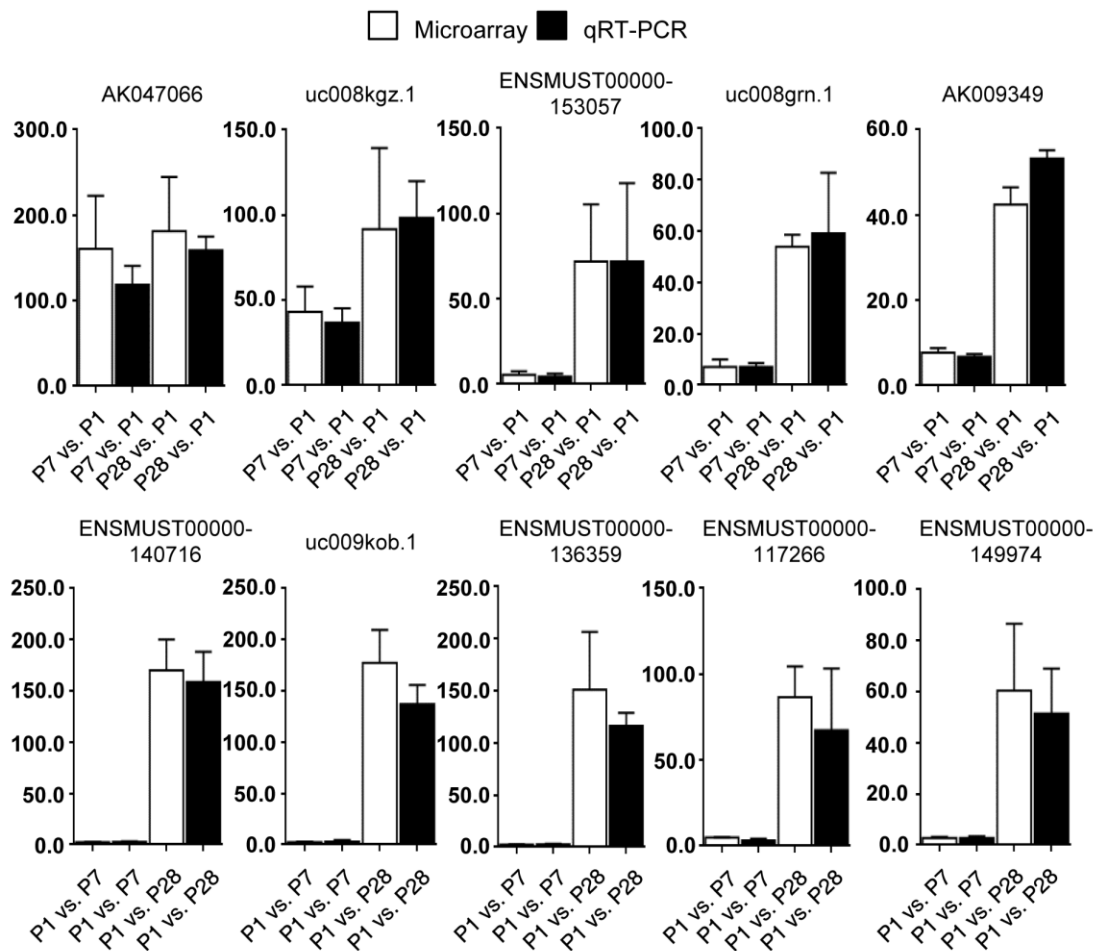

**Supplementary Figure S2. Microarray validation of the top 10 lincRNAs by real time qRT-PCR.** Fold changes between P1 and P7 or P1 and P28 of the top 10 lincRNAs are shown

for both microarray and qRT-PCR data, respectively. Data are presented as mean  $\pm$  S.D.

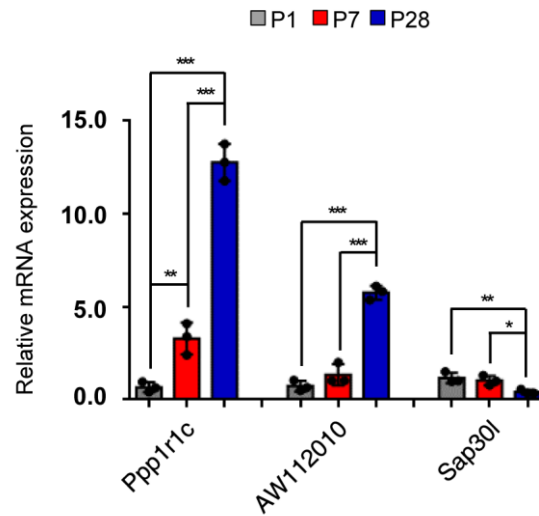

**Supplementary Figure S3. Microarray validation of the 3 differentially expressed neighboring genes by real time qRT-PCR.** The mRNA levels of *Ppp1r1c*, *AW112010* and *Sap30l*, related to lncRNA uc008kgz.1, uc008grn.1, and ENSMUST00000117266, respectively, in P1, P7 and P28 mouse heart were validated by real time qRT-PCR. Data are normalized to *18S*. Data are shown as mean  $\pm$  S.D. \*, \*\* and \*\*\* indicate  $p < 0.05$ ,  $p < 0.01$  and  $p < 0.001$ , respectively, which denote statistical comparison between the two marked groups. One-way ANOVA (*post hoc*: LSD multiple comparison test) was used.

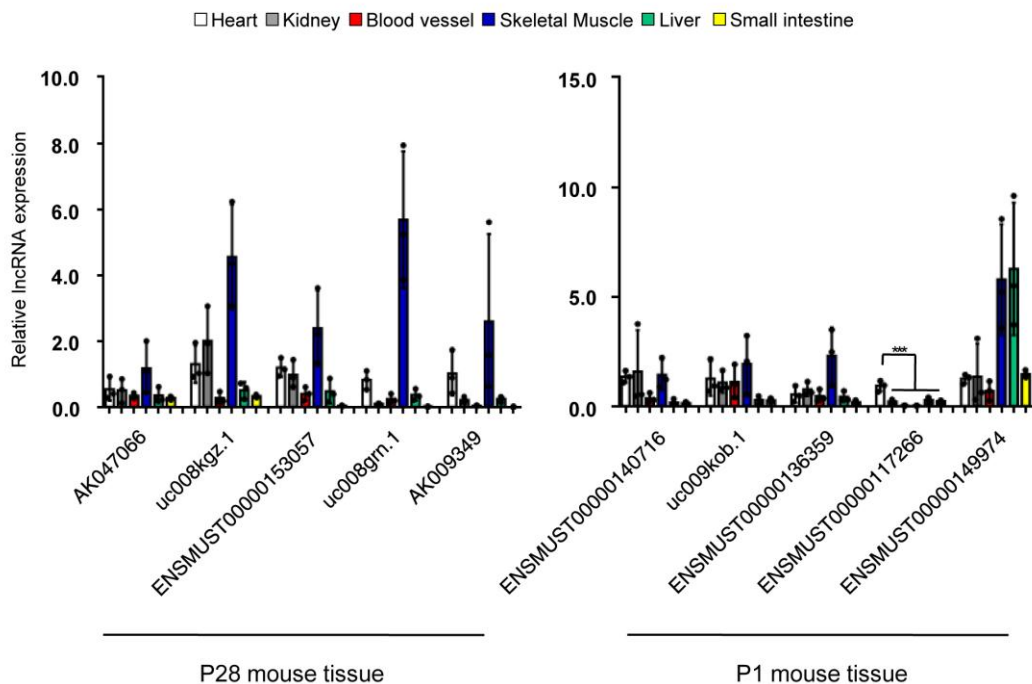

**Supplementary Figure S4. Tissue specificity validation of the top 10 lncRNAs by using *18S* as an internal control.** The expression levels of the top 10 lncRNAs in different mouse

---

tissues that contain smooth muscle cells were determined by real time qRT-PCR. Data were normalized to *18S*. Data are shown as mean  $\pm$  S.D. \*, \*\* and \*\*\* indicate  $p < 0.05$ ,  $p < 0.01$  and  $p < 0.001$ , respectively, which denote statistical comparison between the two marked groups. One-way ANOVA (*post hoc*: LSD multiple comparison test) was conducted. (n = 3 samples per time point).
